# Supplementary material for: Safety Analysis of Biologic Therapies for Chronic Obstructive Pulmonary Disease: A Real-World Study Based on the FAERS Database
Source: Research Square preprint supplement (doi:10.21203/rs.3.rs-7231453/v1), 2025-08-27
Supplement: Supplementary file 1 [file d417d20613ab916155e3fd51.docx]

Supplementary Material 1

**Table S1:** Frequency and Signal Intensity of AEs at SOC Level for Dupilumab

| SOC | Total  (N) | ROR  (95% CI) | PRR(χ²) | EBGM  (EBGM05) | IC(IC025) |
| --- | --- | --- | --- | --- | --- |
| Injury, poisoning and procedural complications | 963 | 3.83 ( 3.54 - 4.15 ) | 2.85 ( 1292.16 ) | 2.81 ( 2.63 ) | 1.49 ( 1.38 ) |
| Respiratory, thoracic and mediastinal disorders | 430 | 0.82 ( 0.74 - 0.91 ) | 0.85 ( 14.75 ) | 0.85 ( 0.78 ) | -0.24 ( -0.39 ) |
| General disorders and administration site conditions | 411 | 1.16 ( 1.04 - 1.29 ) | 1.13 ( 7.49 ) | 1.13 ( 1.04 ) | 0.18 ( 0.03 ) |
| Infections and infestations | 167 | 0.88 ( 0.75 - 1.03 ) | 0.89 ( 2.51 ) | 0.89 ( 0.78 ) | -0.17 ( -0.4 ) |
| Skin and subcutaneous tissue disorders | 143 | 2.42 ( 2.04 - 2.87 ) | 2.35 ( 111.08 ) | 2.32 ( 2.02 ) | 1.22 ( 0.97 ) |
| Nervous system disorders | 105 | 0.59 ( 0.49 - 0.72 ) | 0.61 ( 27.74 ) | 0.61 ( 0.52 ) | -0.71 ( -0.99 ) |
| Musculoskeletal and connective tissue disorders | 105 | 1.06 ( 0.87 - 1.29 ) | 1.06 ( 0.32 ) | 1.06 ( 0.9 ) | 0.08 ( -0.21 ) |
| Eye disorders | 86 | 1.23 ( 0.99 - 1.52 ) | 1.22 ( 3.53 ) | 1.22 ( 1.02 ) | 0.29 ( -0.03 ) |
| Psychiatric disorders | 72 | 0.74 ( 0.59 - 0.94 ) | 0.75 ( 6.17 ) | 0.75 ( 0.62 ) | -0.41 ( -0.76 ) |
| Gastrointestinal disorders | 68 | 0.34 ( 0.26 - 0.43 ) | 0.35 ( 87.27 ) | 0.35 ( 0.29 ) | -1.5 ( -1.85 ) |
| Investigations | 45 | 0.32 ( 0.24 - 0.43 ) | 0.33 ( 63.01 ) | 0.33 ( 0.26 ) | -1.58 ( -2.01 ) |
| Surgical and medical procedures | 40 | 1 ( 0.73 - 1.37 ) | 1 ( 0 ) | 1 ( 0.77 ) | 0.01 ( -0.45 ) |
| Social circumstances | 30 | 3.06 ( 2.13 - 4.4 ) | 3.04 ( 40.32 ) | 3 ( 2.21 ) | 1.58 ( 1.06 ) |
| Immune system disorders | 19 | 1.17 ( 0.74 - 1.84 ) | 1.17 ( 0.46 ) | 1.17 ( 0.8 ) | 0.22 ( -0.43 ) |
| Metabolism and nutrition disorders | 13 | 0.25 ( 0.14 - 0.43 ) | 0.25 ( 29.52 ) | 0.25 ( 0.16 ) | -1.99 ( -2.76 ) |
| Cardiac disorders | 13 | 0.13 ( 0.08 - 0.23 ) | 0.14 ( 71.84 ) | 0.14 ( 0.09 ) | -2.84 ( -3.61 ) |
| Neoplasms benign, malignant and unspecified (incl cysts and polyps) | 11 | 0.25 ( 0.14 - 0.44 ) | 0.25 ( 25.36 ) | 0.25 ( 0.15 ) | -2 ( -2.84 ) |
| Ear and labyrinth disorders | 11 | 1.03 ( 0.57 - 1.87 ) | 1.03 ( 0.01 ) | 1.03 ( 0.63 ) | 0.05 ( -0.79 ) |
| Vascular disorders | 11 | 0.22 ( 0.12 - 0.39 ) | 0.22 ( 30.74 ) | 0.22 ( 0.14 ) | -2.17 ( -3.01 ) |
| Renal and urinary disorders | 8 | 0.16 ( 0.08 - 0.31 ) | 0.16 ( 36.43 ) | 0.16 ( 0.09 ) | -2.65 ( -3.62 ) |
| Product issues | 6 | 0.04 ( 0.02 - 0.09 ) | 0.04 ( 128.83 ) | 0.04 ( 0.02 ) | -4.48 ( -5.57 ) |
| Blood and lymphatic system disorders | 6 | 0.28 ( 0.13 - 0.63 ) | 0.28 ( 10.83 ) | 0.29 ( 0.15 ) | -1.8 ( -2.9 ) |
| Hepatobiliary disorders | 4 | 0.39 ( 0.15 - 1.05 ) | 0.39 ( 3.74 ) | 0.4 ( 0.17 ) | -1.34 ( -2.63 ) |
| Endocrine disorders | 2 | 0.28 ( 0.07 - 1.14 ) | 0.29 ( 3.59 ) | 0.29 ( 0.09 ) | -1.8 ( -3.47 ) |
| Reproductive system and breast disorders | 2 | 0.31 ( 0.08 - 1.22 ) | 0.31 ( 3.16 ) | 0.31 ( 0.1 ) | -1.7 ( -3.37 ) |
| Congenital, familial and genetic disorders | 1 | 0.71 ( 0.1 - 5.1 ) | 0.71 ( 0.11 ) | 0.72 ( 0.14 ) | -0.48 ( -2.53 ) |

**Table S2:** Frequency and Signal Intensity of AEs at SOC Level for Benralizuma

| SOC | Total  (N) | ROR  (95% CI) | PRR(χ²) | EBGM  (EBGM05) | IC(IC025) |
| --- | --- | --- | --- | --- | --- |
| Respiratory, thoracic and mediastinal disorders | 141 | 1.2 ( 0.99 - 1.44 ) | 1.15 ( 3.54 ) | 1.15 ( 0.99 ) | 0.21 ( -0.06 ) |
| General disorders and administration site conditions | 125 | 1.53 ( 1.26 - 1.86 ) | 1.43 ( 18.83 ) | 1.43 ( 1.22 ) | 0.52 ( 0.24 ) |
| Injury, poisoning and procedural complications | 75 | 0.9 ( 0.71 - 1.14 ) | 0.91 ( 0.76 ) | 0.91 ( 0.74 ) | -0.14 ( -0.48 ) |
| Infections and infestations | 48 | 1.07 ( 0.8 - 1.43 ) | 1.06 ( 0.19 ) | 1.06 ( 0.83 ) | 0.09 ( -0.34 ) |
| Nervous system disorders | 43 | 1.04 ( 0.77 - 1.42 ) | 1.04 ( 0.08 ) | 1.04 ( 0.8 ) | 0.06 ( -0.39 ) |
| Investigations | 30 | 0.92 ( 0.64 - 1.33 ) | 0.93 ( 0.18 ) | 0.93 ( 0.68 ) | -0.11 ( -0.64 ) |
| Skin and subcutaneous tissue disorders | 29 | 2.01 ( 1.38 - 2.91 ) | 1.96 ( 13.94 ) | 1.96 ( 1.43 ) | 0.97 ( 0.43 ) |
| Product issues | 28 | 0.87 ( 0.59 - 1.26 ) | 0.87 ( 0.56 ) | 0.87 ( 0.63 ) | -0.2 ( -0.75 ) |
| Psychiatric disorders | 24 | 1.04 ( 0.69 - 1.57 ) | 1.04 ( 0.04 ) | 1.04 ( 0.74 ) | 0.06 ( -0.53 ) |
| Gastrointestinal disorders | 22 | 0.46 ( 0.3 - 0.7 ) | 0.47 ( 13.78 ) | 0.47 ( 0.33 ) | -1.08 ( -1.69 ) |
| Musculoskeletal and connective tissue disorders | 22 | 0.92 ( 0.6 - 1.4 ) | 0.92 ( 0.16 ) | 0.92 ( 0.64 ) | -0.12 ( -0.73 ) |
| Cardiac disorders | 21 | 0.93 ( 0.61 - 1.44 ) | 0.94 ( 0.09 ) | 0.94 ( 0.65 ) | -0.09 ( -0.72 ) |
| Vascular disorders | 10 | 0.84 ( 0.45 - 1.56 ) | 0.84 ( 0.32 ) | 0.84 ( 0.5 ) | -0.25 ( -1.13 ) |
| Renal and urinary disorders | 8 | 0.66 ( 0.33 - 1.32 ) | 0.66 ( 1.41 ) | 0.66 ( 0.37 ) | -0.6 ( -1.56 ) |
| Blood and lymphatic system disorders | 8 | 1.59 ( 0.79 - 3.21 ) | 1.59 ( 1.75 ) | 1.59 ( 0.88 ) | 0.67 ( -0.3 ) |
| Immune system disorders | 6 | 1.54 ( 0.69 - 3.44 ) | 1.53 ( 1.11 ) | 1.53 ( 0.78 ) | 0.61 ( -0.48 ) |
| Eye disorders | 5 | 0.29 ( 0.12 - 0.7 ) | 0.29 ( 8.67 ) | 0.29 ( 0.14 ) | -1.76 ( -2.95 ) |
| Neoplasms benign, malignant and unspecified (incl cysts and polyps) | 5 | 0.47 ( 0.19 - 1.13 ) | 0.47 ( 3.01 ) | 0.47 ( 0.23 ) | -1.08 ( -2.27 ) |
| Social circumstances | 5 | 2.09 ( 0.86 - 5.04 ) | 2.08 ( 2.8 ) | 2.08 ( 0.99 ) | 1.05 ( -0.13 ) |
| Metabolism and nutrition disorders | 5 | 0.4 ( 0.17 - 0.96 ) | 0.4 ( 4.5 ) | 0.4 ( 0.19 ) | -1.31 ( -2.49 ) |
| Reproductive system and breast disorders | 3 | 1.92 ( 0.62 - 5.98 ) | 1.92 ( 1.32 ) | 1.91 ( 0.74 ) | 0.94 ( -0.51 ) |
| Hepatobiliary disorders | 2 | 0.82 ( 0.2 - 3.29 ) | 0.82 ( 0.08 ) | 0.82 ( 0.26 ) | -0.28 ( -1.96 ) |
| Endocrine disorders | 1 | 0.59 ( 0.08 - 4.23 ) | 0.59 ( 0.28 ) | 0.6 ( 0.12 ) | -0.75 ( -2.79 ) |
| Ear and labyrinth disorders | 1 | 0.39 ( 0.05 - 2.76 ) | 0.39 ( 0.96 ) | 0.39 ( 0.08 ) | -1.36 ( -3.4 ) |

**Table S3:** Frequency and Signal Intensity of AEs at SOC Level for Mepolizumab

| SOC | Total  (N) | ROR  (95% CI) | PRR(χ²) | EBGM  (EBGM05) | IC(IC025) |
| --- | --- | --- | --- | --- | --- |
| Respiratory, thoracic and mediastinal disorders | 300 | 2.7 ( 2.34 - 3.12 ) | 2.06 ( 199.8 ) | 2.06 ( 1.82 ) | 1.04 ( 0.84 ) |
| General disorders and administration site conditions | 153 | 1.58 ( 1.33 - 1.89 ) | 1.47 ( 26.45 ) | 1.47 ( 1.27 ) | 0.56 ( 0.3 ) |
| Injury, poisoning and procedural complications | 143 | 1.56 ( 1.3 - 1.86 ) | 1.46 ( 23.21 ) | 1.45 ( 1.25 ) | 0.54 ( 0.28 ) |
| Nervous system disorders | 31 | 0.61 ( 0.43 - 0.88 ) | 0.63 ( 7.24 ) | 0.63 ( 0.47 ) | -0.67 ( -1.19 ) |
| Infections and infestations | 28 | 0.5 ( 0.34 - 0.73 ) | 0.52 ( 13.42 ) | 0.52 ( 0.38 ) | -0.95 ( -1.49 ) |
| Gastrointestinal disorders | 25 | 0.43 ( 0.29 - 0.65 ) | 0.45 ( 17.89 ) | 0.45 ( 0.32 ) | -1.15 ( -1.72 ) |
| Musculoskeletal and connective tissue disorders | 16 | 0.55 ( 0.34 - 0.9 ) | 0.56 ( 5.75 ) | 0.56 ( 0.37 ) | -0.84 ( -1.54 ) |
| Social circumstances | 16 | 5.71 ( 3.47 - 9.39 ) | 5.61 ( 60.25 ) | 5.56 ( 3.67 ) | 2.48 ( 1.77 ) |
| Psychiatric disorders | 15 | 0.54 ( 0.32 - 0.89 ) | 0.54 ( 5.91 ) | 0.55 ( 0.36 ) | -0.88 ( -1.6 ) |
| Skin and subcutaneous tissue disorders | 13 | 0.73 ( 0.42 - 1.27 ) | 0.74 ( 1.26 ) | 0.74 ( 0.46 ) | -0.44 ( -1.22 ) |
| Investigations | 12 | 0.3 ( 0.17 - 0.53 ) | 0.31 ( 19.32 ) | 0.31 ( 0.19 ) | -1.69 ( -2.49 ) |
| Product issues | 7 | 0.18 ( 0.08 - 0.37 ) | 0.18 ( 26.97 ) | 0.18 ( 0.1 ) | -2.45 ( -3.48 ) |
| Immune system disorders | 6 | 1.29 ( 0.58 - 2.87 ) | 1.28 ( 0.38 ) | 1.28 ( 0.65 ) | 0.36 ( -0.74 ) |
| Neoplasms benign, malignant and unspecified (incl cysts and polyps) | 5 | 0.39 ( 0.16 - 0.94 ) | 0.39 ( 4.71 ) | 0.4 ( 0.19 ) | -1.34 ( -2.52 ) |
| Vascular disorders | 4 | 0.28 ( 0.1 - 0.74 ) | 0.28 ( 7.5 ) | 0.28 ( 0.12 ) | -1.83 ( -3.13 ) |
| Surgical and medical procedures | 4 | 0.35 ( 0.13 - 0.92 ) | 0.35 ( 4.92 ) | 0.35 ( 0.15 ) | -1.52 ( -2.81 ) |
| Cardiac disorders | 4 | 0.15 ( 0.05 - 0.39 ) | 0.15 ( 20.06 ) | 0.15 ( 0.07 ) | -2.74 ( -4.04 ) |
| Metabolism and nutrition disorders | 3 | 0.2 ( 0.06 - 0.62 ) | 0.2 ( 9.59 ) | 0.2 ( 0.08 ) | -2.3 ( -3.75 ) |
| Eye disorders | 3 | 0.14 ( 0.05 - 0.45 ) | 0.15 ( 15.09 ) | 0.15 ( 0.06 ) | -2.75 ( -4.2 ) |
| Renal and urinary disorders | 3 | 0.2 ( 0.07 - 0.64 ) | 0.21 ( 9.24 ) | 0.21 ( 0.08 ) | -2.27 ( -3.71 ) |
| Reproductive system and breast disorders | 3 | 1.61 ( 0.52 - 5.01 ) | 1.61 ( 0.69 ) | 1.6 ( 0.62 ) | 0.68 ( -0.77 ) |
| Blood and lymphatic system disorders | 1 | 0.16 ( 0.02 - 1.17 ) | 0.17 ( 4.23 ) | 0.17 ( 0.03 ) | -2.59 ( -4.63 ) |
| Hepatobiliary disorders | 1 | 0.34 ( 0.05 - 2.44 ) | 0.34 ( 1.26 ) | 0.34 ( 0.07 ) | -1.54 ( -3.58 ) |

**Table S4: Frequency and Signal Intensity of AEs at SOC Level for Tezepelumab**

| SOC | Total(N) | | ROR  (95% CI) | PRR(χ²) | EBGM  (EBGM05) | IC(IC025) |
| --- | --- | --- | --- | --- | --- | --- |
| Respiratory, thoracic and mediastinal disorders | | 21 | 2.15 ( 0.3 - 15.39 ) | 2.14 ( 0.61 ) | 2.14 ( 0.41 ) | 1.1 ( -0.96 ) |
| General disorders and administration site conditions | | 20 | 0.43 ( 0.06 - 3.05 ) | 0.43 ( 0.77 ) | 0.43 ( 0.08 ) | -1.21 ( -3.27 ) |
| Investigations | | 18 | 0.3 ( 0.04 - 2.16 ) | 0.31 ( 1.6 ) | 0.31 ( 0.06 ) | -1.7 ( -3.76 ) |
| Musculoskeletal and connective tissue disorders | | 11 | 0.11 ( 0.01 - 0.75 ) | 0.11 ( 7.53 ) | 0.11 ( 0.02 ) | -3.15 ( -5.21 ) |
| Infections and infestations | | 11 | 0.16 ( 0.02 - 1.11 ) | 0.16 ( 4.55 ) | 0.16 ( 0.03 ) | -2.62 ( -4.68 ) |
| Cardiac disorders | | 8 | 0.49 ( 0.07 - 3.49 ) | 0.49 ( 0.53 ) | 0.49 ( 0.09 ) | -1.02 ( -3.08 ) |
| Immune system disorders | | 6 | 0.87 ( 0.22 - 3.53 ) | 0.87 ( 0.04 ) | 0.87 ( 0.27 ) | -0.19 ( -1.88 ) |
| Nervous system disorders | | 5 | 3.15 ( 1 - 9.91 ) | 3.1 ( 4.3 ) | 3.1 ( 1.19 ) | 1.63 ( 0.17 ) |
| Surgical and medical procedures | | 5 | 0.44 ( 0.11 - 1.79 ) | 0.45 ( 1.38 ) | 0.45 ( 0.14 ) | -1.15 ( -2.83 ) |
| Metabolism and nutrition disorders | | 4 | 0.17 ( 0.05 - 0.54 ) | 0.19 ( 11.85 ) | 0.19 ( 0.07 ) | -2.4 ( -3.86 ) |
| Skin and subcutaneous tissue disorders | | 3 | 2.79 ( 1.14 - 6.83 ) | 2.72 ( 5.51 ) | 2.72 ( 1.29 ) | 1.44 ( 0.24 ) |
| Injury, poisoning and procedural complications | | 3 | 1.7 ( 0.63 - 4.61 ) | 1.68 ( 1.13 ) | 1.68 ( 0.73 ) | 0.75 ( -0.57 ) |
| Blood and lymphatic system disorders | | 3 | 1.06 ( 0.34 - 3.32 ) | 1.06 ( 0.01 ) | 1.06 ( 0.4 ) | 0.08 ( -1.39 ) |
| Psychiatric disorders | | 2 | 8.34 ( 3.67 - 18.95 ) | 8 ( 36.85 ) | 7.98 ( 4.01 ) | 3 ( 1.87 ) |
| Vascular disorders | | 2 | 0.62 ( 0.25 - 1.51 ) | 0.63 ( 1.15 ) | 0.63 ( 0.3 ) | -0.66 ( -1.87 ) |
| Neoplasms benign, malignant and unspecified (incl cysts and polyps) | | 1 | 0.87 ( 0.55 - 1.4 ) | 0.9 ( 0.31 ) | 0.9 ( 0.61 ) | -0.16 ( -0.83 ) |
| Gastrointestinal disorders | | 1 | 1.23 ( 0.76 - 1.98 ) | 1.19 ( 0.73 ) | 1.19 ( 0.8 ) | 0.26 ( -0.42 ) |
| Product issues | | 1 | 3.21 ( 1.95 - 5.29 ) | 2.9 ( 23.53 ) | 2.9 ( 1.91 ) | 1.54 ( 0.83 ) |
| Eye disorders | | 1 | 2.53 ( 1.36 - 4.69 ) | 2.39 ( 9.26 ) | 2.39 ( 1.43 ) | 1.26 ( 0.39 ) |
| Renal and urinary disorders | | 1 | 1.29 ( 0.7 - 2.4 ) | 1.27 ( 0.67 ) | 1.27 ( 0.76 ) | 0.34 ( -0.53 ) |
| Hepatobiliary disorders | | 1 | 1.92 ( 0.94 - 3.92 ) | 1.86 ( 3.29 ) | 1.86 ( 1.02 ) | 0.9 ( -0.1 ) |

**Table S5:** Frequency and Signal Intensity of AEs at PT Level for Dupilumab

| SOC | PT(N) |
| --- | --- |
| Vascular disorders | Deep vein thrombosis(3), Deep vein thrombosis(1), Haemorrhage(1), Thrombosis(1), Hypotension(1),  Flushing(1), Phlebitis(1), Vasodilatation(1), Vascular pain(1), Hypertension(1) |
| Surgical and medical procedures | Hospitalisation(28), Surgery(2), Spinal fusion surgery(2), Intensive care(2), Spinal operation(2), Knee arthroplasty(1), Vaginal operation(1), Limb immobilisation(1), Cardiac operation(1) |
| Social circumstances | Loss of personal independence in daily activities(15), Impaired quality of life(13), Impaired work ability(2) |
| Skin and subcutaneous tissue disorders | Rash(30), Pruritus(23), Erythema(12), Skin exfoliation(9), Eczema(8), Dry skin(7), Rash macular(5), Skin swelling(5), Alopecia(4), Skin disorder(3), Skin burning sensation(3), Rash pruritic(3), Skin fissures(3), Dermatitis exfoliative generalised(2), Skin atrophy(2), Blister(2), Rash erythematous(2), Skinhaemorrhage(2), Skin weeping(2), Urticaria(2), Erythema nodosum(1), Dermatitis atopic(1), Scab(1), Dermatitis diaper(1), Dermatitis acneiform(1), Skin mass(1), Skin ulcer(1), Pemphigoid(1), Hyperhidrosis(1), Skin discolouration(1), Skin erosion(1), Alopecia areata(1), Ingrowing nail(1), Night sweats(1) |
| Respiratory, thoracic and mediastinal disorders | Dyspnoea(123), Cough(62), Asthma(51), Chronic obstructive pulmonary disease(42), Wheezing(23), Productive cough(15), Rhinorrhoea(11), Dysphonia(8), Nasal congestion(7), Dyspnoea exertional(7), Oropharyngeal pain(6), Upper-airway cough syndrome(4), Sinus disorder(4), Respiration abnormal(4), Sputum increased(4), Pulmonary hypertension(3), Lung disorder(3), Respiratory tract congestion(3), Respiratory disorder(2), Pulmonary oedema(2), Pulmonary mass(2), Emphysema(2), Sputum discoloured(2), Hyperventilation(2), Sleep apnoea syndrome(2), Choking(2), Oropharyngeal discomfort(2), Paranasal sinus hypersecretion(1), Respiratory failure(1), Tracheomalacia(1), Tracheal stenosis(1), Hypoxia(1), Throat clearing(1), Sneezing(1), Pneumonitis(1), Pulmonary embolism(1), Pleural effusion(1), Lung consolidation(1), Haemoptysis(1), Respiratory distress(1), Nasal polyps(1), Bronchiectasis(1), Obstructive airways disorder(1), Respiratory symptom(1), Pulmonary congestion(1), Pulmonary pain(1), Painful respiration(1), Epistaxis(1), Lung opacity(1), Bronchial hyperreactivity(1), Aspiration(1), Sinus pain(1), Nasal crusting(1), Nasal pruritus(1), Increased bronchial secretion(1), Increased viscosity of upper respiratory secretion(1), Aphonia(1), Suffocation feeling(1), Apnoea(1), Genital rash(1), Prostatic disorder(1) |
| Renal and urinary disorders | Nephrolithiasis(4), Acute kidney injury(1), Haematuria(1), Urinary retention(1), Renal disorder(1) |
| Psychiatric disorders | Insomnia(8), Sleep disorder due to a general medical condition(8), Anxiety(7), Middle insomnia(7), Stress(5), Depression(5), Sleep disorder(4), Depressed mood(3), Completed suicide(2), Nervousness(2), Mood altered(1), Hallucination(1), Intentional self-injury(1), Confusional state(1), Somnambulism(1), Irritability(1), Anger(1), Mood swings(1), Feeling of despair(1), Suicidal ideation(1), Mental disorder(1), Agitation(1), Terminal insomnia(1), Initial insomnia(1), Panic disorder(1), Helplessness(1), Feeling guilty(1), Aggression(1), Restlessness(1), Fear of injection(1), Decreased interest(1) |
| Product issues | Device issue(3), Device leakage(1), Needle issue(1), Device malfunction(1) |
| Nervous system disorders | Dizziness(15), Headache(15), Paraesthesia(8), Hypoaesthesia(8), Memory impairment(6), Somnolence(5), Tremor(5), Presyncope(3), Balance disorder(2), Burning sensation(2), Dizziness postural(2), Loss of consciousness(2), Neuralgia(2), Cerebrovascular accident(2), Speech disorder(2), Syncope(2), Migraine(2), Embolic stroke(1), Dementia(1), Amnesia(1), Ageusia(1), Sleep deficit(1), Chronic inflammatory demyelinating polyradiculoneuropathy(1), Lethargy(1), Brain injury(1), Hypersomnia(1), Parosmia(1), Hypokinesia(1), Essential tremor(1), Carpal tunnel syndrome(1), Disturbance in attention(1), Anosmia(1), Brain fog(1), Restless legs syndrome(1), Intracranial aneurysm(1), Neuropathy peripheral(1), Parkinson's disease(1), Nerve compression(1), Dysgeusia(1) |
| Neoplasms benign, malignant and unspecified (incl cysts and polyps) | Lung neoplasm malignant(4), Neoplasm malignant(3), Pituitary tumour(1), Metastases to bone(1), Small cell lung cancer(1), Lung carcinoma cell type unspecified stage IV(1) |
| Musculoskeletal and connective tissue disorders | Arthralgia(33), Pain in extremity(14), Myalgia(14), Back pain(6), Arthritis(6), Neck pain(4), Musculoskeletal stiffness(3), Muscle spasms(3), Joint swelling(3), Mobility decreased(3), Muscular weakness(2), Rhabdomyolysis(1), Osteoporosis(1), Pain in jaw(1), Joint stiffness(1), Fibromyalgia(1), Bone disorder(1), Psoriatic arthropathy(1), Bursitis(1), Bone lesion(1), Muscle tightness(1), Muscle rigidity(1), Musculoskeletal chest pain(1), Rheumatoid arthritis(1), Intervertebral disc protrusion(1) |
| Metabolism and nutrition disorders | Fluid retention(5), Gout(2), Increased appetite(1), Diabetes mellitus(1), Hypervolaemia(1), Decreased appetite(1), Hyperkalaemia(1), Diabetes mellitus inadequate control(1) |
| Investigations | Weight increased(6), Weight decreased(4), Eosinophil count increased(4), Blood pressure decreased(2), SARS-CoV-2 test positive(2), Oxygen consumption increased(2), Pulmonary function test decreased(2), Oxygen saturation decreased(2), Respiratory rate decreased(1), Blood cholesterol decreased(1), Eosinophil count decreased(1), SARS-CoV-2 test(1), Haemoglobin decreased(1), General physical condition abnormal(1), Blood glucose increased(1), Brain natriuretic peptide increased(1), Hepatic enzyme abnormal(1), Transaminases increased(1), Blood potassium decreased(1), Vitamin D decreased(1), Heart rate irregular(1), Blood pressure abnormal(1), Platelet count decreased(1), Oxygen saturation increased(1), Blood pressure increased(1), Oxygen consumption decreased(1), Heart rate decreased(1), Oxygen consumption(1), Heart rate increased(1) |
| Injury, poisoning and procedural complications | Product use in unapproved indication(514), Off label use(121), Accidental exposure to product(57), Exposure via skin contact(50), Incorrect dose administered(38), Inappropriate schedule of product administration(31), Product prescribing issue(27), Product dose omission issue(21), Product use issue(13), Product dose omission in error(12), Fall(10), Product preparation error(8), Extra dose administered(7), Contusion(6), Product storage error(5), Product prescribing error(3), Wrong technique in product usage process(3), Wrong technique in device usage process(2), Hand fracture(2), Limb injury(2), Skin laceration(2), Intentional dose omission(2), Foot fracture(1), Chest injury(1), Gun shot wound(1), Vascular injury(1), Superficial injury of eye(1), Device difficult to use(1), Exposure during pregnancy(1), Wrist fracture(1), Product dispensing issue(1), Femur fracture(1), Product communication issue(1), Circumstance or information capable of leading to medication error(1), Ligament sprain(1), Lower limb fracture(1), Unintentional use for unapproved indication(1), Road traffic accident(1), Joint injury(1), Hip fracture(1), Scratch(1), Incorrect route of product administration(1), Wound(1), Ankle fracture(1), Arthropod bite(1), Intentional product misuse(1), Pneumoconiosis(1), Multiple fractures(1), Incisional hernia(1) |
| Infections and infestations | Pneumonia(25), Covid-19(22), Nasopharyngitis(14), Infection(10), Conjunctivitis(9), Influenza(8), Sinusitis(8), Bronchitis(8), Respiratory tract infection(7), Oral herpes(5), Herpes zoster(3), Respiratory syncytial virus infection(3), Upper respiratory tract infection(3), Lower respiratory tract infection(3), Sepsis(2), Eye infection(2), Ear infection(2), Pneumonia bacterial(2), Urinary tract infection(2), Herpes simplex(2), Pustule(2), Gastroenteritis viral(2), Bacterial infection(2), Candida sepsis(1), Atypical mycobacterial pneumonia(1), Urosepsis(1), Pneumonia fungal(1), Mycobacterium avium complex infection(1), Pertussis(1), Pseudomonas infection(1), Fungal infection(1), Abscess(1), Diverticulitis(1), Upper respiratory fungal infection(1), Rhinovirus infection(1), Localised infection(1), Respiratory tract infection viral(1), Nail infection(1), Cellulitis staphylococcal(1), Tinea infection(1), Coronavirus infection(1), Viral infection(1), Atypical pneumonia(1), Streptococcal infection(1) |
| Immune system disorders | Drug hypersensitivity(9), Hypersensitivity(6), Multiple allergies(1), Immunosuppression(1), Allergy to plants(1), Dust allergy(1), Cholelithiasis(1), Cholestasis(1), Hepatitis(1), Drug-induced liver injury(1) |
| General disorders and administration site conditions | Injection site pain(52), Drug ineffective(32), Condition aggravated(27), Pain(21), Fatigue(19), Drug ineffective for unapproved indication(18), Malaise(17), Therapeutic response decreased(17), Injection site swelling(15), Peripheral swelling(12), Chest discomfort(11), Injection site erythema(9), Death(9), Therapeutic response shortened(9), Swelling(8), Illness(8), Therapeutic response unexpected(8), Chest pain(8), Pyrexia(7), Drug effective for unapproved indication(7), Gait disturbance(7), Chills(6), Asthenia(6), Injection site bruising(6), Secretion discharge(5), Drug effect less than expected(5), Injection site discomfort(4), Feeling abnormal(4), Feeling hot(3), Injection site rash(3), Injection site haemorrhage(3), Influenza like illness(3), Injection site mass(3), Injection site urticaria(3), Swelling face(2), Injury associated with device(2), Symptom recurrence(2), Therapeutic product effect incomplete(2), Decreased activity(2), Cyst(1), Facial pain(1), Energy increased(1), Injection site nodule(1), Injection site pruritus(1), Injection site indentation(1), Injection site reaction(1), Injection site exfoliation(1), Injection site dryness(1), Oedema peripheral(1), Oedema(1), Impaired healing(1), Obstruction(1), Feeling cold(1), Disease progression(1), Drug interaction(1), Injection site injury(1), General physical health deterioration(1), Ulcer(1), Inflammation(1), Discomfort(1), Injection site inflammation(1), Injection site irritation(1), Gait inability(1), No adverse event(1), Drug withdrawal syndrome(1) |
| Gastrointestinal disorders | Nausea(12), Diarrhoea(7), Abdominal discomfort(5), Vomiting(4), Constipation(3), Abdominal pain(3), Hypoaesthesia oral(2), Toothache(2), Haematochezia(2), Abdominal pain upper(2), Flatulence(2), Tongue ulceration(1), Salivary gland enlargement(1), Faeces discoloured(1), Steatorrhoea(1), Paraesthesia oral(1), Glossitis(1), Stomatitis(1), Bowel movement irregularity(1), Dysphagia(1), Gastrointestinal disorder(1), Gastrooesophageal reflux disease(1), Eosinophilic oesophagitis(1), Colitis(1), Diverticular perforation(1), Haemorrhoids(1), Mouth ulceration(1), Dry mouth(1), Diverticulum intestinal(1), Abdominal distension(1), Faeces soft(1), Lip swelling(1), Gastritis(1), Glossodynia(1), Oesophageal disorder(1) |
| Eye disorders | Eye pruritus(12), Dry eye(11), Vision blurred(11), Visual impairment(9), Lacrimation increased(6), Eye irritation(5), Eye pain(5), Eye disorder(4), Eye swelling(4), Ocular hyperaemia(4), Cataract(3), Eye haemorrhage(2), Blindness(1), Photophobia(1), Diplopia(1), Keratitis(1), Foreign body sensation in eyes(1), Eyelid irritation(1), Eyelid margin crusting(1), Eye discharge(1), Swollen tear duct(1), Eyelid cyst(1) |
| Endocrine disorders | Adrenal suppression(1), Adrenal insufficiency(1) |
| Ear and labyrinth disorders | Vertigo(4), Tinnitus(2), Hypoacusis(2), Ear discomfort(1), Auditory disorder(1), Deafness unilateral(1) |
| Congenital, familial and genetic disorders | Paroxysmal extreme pain disorder(1), |
| Cardiac disorders | Cardiac failure congestive(2), Angina pectoris(2), Chronic right ventricular failure(1), Palpitations(1), Cardiac flutter(1), Cardiac disorder(1), Myocardial infarction(1), Tachycardia(1), Cardiac arrest(1), Cardiac failure(1), Atrial fibrillation(1) |
| Blood and lymphatic system disorders | Lymphadenopathy(3), Lymphadenopathy mediastinal(1), Anaemia(1), Immune thrombocytopenia(1) |

**Table S6:** Frequency and Signal Intensity of AEs at PT Level for Benralizuma

| SOC | PT(N) |
| --- | --- |
| Vascular disorders | Hypovolaemic shock (1), Poor peripheral circulation (1), Haemorrhage (1), Peripheral vascular disorder (1), Peripheral coldness (1), Vein disorder (1), Hypertension (1), Varicose vein (1), Thrombophlebitis (1), Thrombosis (1), |
| Social circumstances | Loss of personal independence in daily activities (2), Insurance issue (2), Inability to afford medication (1) |
| Skin and subcutaneous tissue disorders | Pruritus (8), Rash (4), Urticaria (3), Rash pruritic (2), Erythema (2), Skin discolouration (2), Scab (1), Skin disorder (1), Alopecia (1), Eczema (1), Dermatitis (1), Rash papular (1), Rash erythematous (1), Skin exfoliation (1) |
| Respiratory, thoracic and mediastinal disorders | Dyspnoea (35), Asthma (24), Chronic obstructive pulmonary disease (16), Cough (11), Dysphonia (7), Wheezing (7), Oropharyngeal pain (5), Acute respiratory failure (4), Lung disorder (4), Respiratory failure (3), Pulmonary oedema (3), Emphysema (2), Productive cough (2), Acute pulmonary oedema (1), Pneumothorax spontaneous (1), Irregular breathing (1), Choking (1), Bronchial hyperreactivity (1), Bronchial secretion retention (1), Pulmonary embolism (1), Oropharyngeal discomfort (1), Respiratory disorder (1), Rales (1), Chronic respiratory failure (1), Asthma-chronic obstructive pulmonary disease overlap syndrome (1), Dyspnoea exertional (1), Hypercapnia (1), Bronchospasm (1), Aspiration (1), Asthmatic crisis (1), Pleural effusion (1) |
| Reproductive system and breast disorders | Priapism (2), Prostatitis (1) |
| Renal and urinary disorders | Hydronephrosis (3), Dysuria (2), Acute kidney injury (1), Haematuria (1), Incontinence (1) |
| Psychiatric disorders | Anxiety (5), Depression (3), Suicidal ideation (3), Agitation (2), Stress (2), Poor quality sleep (1), Frustration tolerance decreased (1), Nervousness (1), Hypervigilance (1), Insomnia (1), Restlessness (1), Sleep terror (1), Panic attack (1), Mental disorder (1) |
| Product issues | Device leakage (10), Needle issue (5), Device delivery system issue (4), Device malfunction (4), Product distribution issue (3), Device breakage (1), Device issue (1) |
| Nervous system disorders | Headache (14), Dizziness (3), Somnolence (3), Speech disorder (3), Memory impairment (2), Burning sensation (2), Tremor (2), Psychomotor hyperactivity (1), Carotid artery occlusion (1), Cerebrovascular accident (1), Movement disorder (1), Dementia (1), Lethargy (1), Dysstasia (1), Hypoaesthesia (1), Cognitive disorder (1), Cerebral haemorrhage (1), Migraine (1), Brain fog (1), Syncope (1), Amnesia (1) |
| Neoplasms benign, malignant and unspecified (incl cysts and polyps) | Breast cancer recurrent (1), Gastrointestinal stromal tumour (1), Laryngeal cancer (1), Neoplasm malignant (1), Breast cancer in situ (1) |
| Musculoskeletal and connective tissue disorders | Muscle spasms (3), Pain in extremity (3), Osteoarthritis (2), Osteoporosis (2), Limb discomfort (2), Arthralgia (2), Back pain (2), Arthritis (1), Neck mass (1), Neck pain (1), Joint effusion (1), Chondromalacia (1), Musculoskeletal pain (1) |
| Metabolism and nutrition disorders | Decreased appetite (2), Feeding disorder (1), Fluid retention (1), Hyperglycaemia (1) |
| Investigations | Weight increased (6), Weight decreased (4), Eosinophil count increased (3), Sars-cov-2 test negative (2), Oxygen saturation decreased (2), Heart rate increased (2), Eosinophil count abnormal (1), Blood calcium increased (1), Blood pressure increased (1), Body height decreased (1), Blood pressure abnormal (1), Breath sounds abnormal (1), Pulmonary function test decreased (1), Laboratory test abnormal (1), Blood glucose increased (1), Weight abnormal (1), Echocardiogram abnormal (1) |
| Injury, poisoning and procedural complications | Off label use (19), Product dose omission issue (13), Product use issue (7), Product use in unapproved indication (6), Inappropriate schedule of product administration (6), Wrong technique in device usage process (3), Drug dose omission by device (3), Device use issue (3), Scar (2), Contusion (1), Procedural intestinal perforation (1), Intentional product use issue (1), Exposure to sars-cov-2 (1), Intentional product misuse (1), Incorrect dose administered by device (1), Cartilage injury (1), Patella fracture (1), Fall (1), Scratch (1), Product prescribing issue (1), Product administration error (1), Hip fracture (1) |
| Infections and infestations | Pneumonia (10), Bronchitis (5), Sinusitis (4), Urinary tract infection (3), Septic shock (2), Influenza (2), Sepsis (2), Aspergillus infection (2), Covid-19 (2), Peritonitis (1), Herpes zoster (1), Pneumonia fungal (1), Pneumonia pseudomonal (1), Cystitis (1), Escherichia bacteraemia (1), Pneumonia aspiration (1), H1n1 influenza (1), Pneumonia viral (1), Nasopharyngitis (1), Ear infection (1), Covid-19 pneumonia (1), Candida infection (1), Rhinitis (1), Localised infection (1), Infection (1) |
| Immune system disorders | Anaphylactic reaction (1), Hypersensitivity (1), Eosinophilic granulomatosis with polyangiitis (1), Immune system disorder (1), Immunodeficiency (1), Drug hypersensitivity (1) |
| Hepatobiliary disorders | Jaundice cholestatic (1), Liver disorder (1) |
| General disorders and administration site conditions | Drug ineffective (16), Fatigue (14), Malaise (8), Pain (7), Death (7), Pyrexia (6), Injection site pain (6), Gait disturbance (5), Swelling (5), Feeling abnormal (5), Chills (4), Ill-defined disorder (4), Asthenia (3), Influenza like illness (3), Chest discomfort (3), Multiple organ dysfunction syndrome (2), Feeling hot (2), General physical health deterioration (2), Decreased activity (2), Symptom recurrence (2), Therapeutic response shortened (2), Peripheral swelling (2), Condition aggravated (2), Secretion discharge (1), Feeling cold (1), Sensation of blood flow (1), Sensation of foreign body (1), Injection site extravasation (1), Swelling face (1), Gait inability (1), Inflammation (1), Therapeutic product effect decreased (1), Injection site discharge (1), Therapeutic product effect incomplete (1), Injury associated with device (1), Oedema peripheral (1) |
| Gastrointestinal disorders | Nausea (5), Vomiting (3), Large intestine perforation (1), Lower gastrointestinal haemorrhage (1), Autoimmune pancreatitis (1), Diarrhoea (1), Lip disorder (1), Enteritis (1), Swollen tongue (1), Ileus (1), Dysphagia (1), Mouth ulceration (1), Vomiting projectile (1), Varices oesophageal (1), Abdominal discomfort (1), Stomatitis (1) |
| Eye disorders | Vision blurred (2), Visual acuity reduced (1), Dyschromatopsia (1), Visual impairment (1) |
| Endocrine disorders | Parathyroid disorder (1) |
| Ear and labyrinth disorders | Ear pruritus (1) |
| Cardiac disorders | Atrial fibrillation (4), Cardiac disorder (4), Supraventricular tachycardia (2), Angina unstable (1), Myocardial infarction (1), Tachycardia (1), Arrhythmia (1), Atrioventricular block (1), Coronary artery occlusion (1), Supraventricular extrasystoles (1), Sinus arrhythmia (1), Cardiac flutter (1), Cardiovascular disorder (1), Pericardial effusion (1) |
| Blood and lymphatic system disorders | Disseminated intravascular coagulation (2), Pancytopenia (1), Lymphadenopathy (1), Anaemia (1), Immune thrombocytopenia (1), Thrombocytopenia (1), Intrapulmonary lymphadenopathy (1) |

**Table S7:** Frequency and Signal Intensity of AEs at PT Level for Mepolizumab

| SOC | PT (N) |
| --- | --- |
| Vascular disorders | Hypertension (1), Flushing (1), Varicose vein (1), Spider vein (1) |
| Surgical and medical procedures | Hospitalisation (2), Therapy cessation (1), Quarantine (1) |
| Social circumstances | Patient dissatisfaction with treatment (13), Social problem (1), Bedridden (1), Loss of personal independence in daily activities (1) |
| Skin and subcutaneous tissue disorders | Erythema (3), Pruritus (2), Nail bed disorder (1), Yellow skin (1), Rash pruritic (1), Rash macular (1), Circumoral swelling (1), Dermatitis exfoliative generalised (1), Night sweats (1), Hyperhidrosis (1) |
| Respiratory, thoracic and mediastinal disorders | Chronic obstructive pulmonary disease (211), Dyspnoea (31), Asthma (11), Cough (11), Wheezing (6), Productive cough (4), Lung disorder (2), Respiratory tract congestion (2), Respiratory arrest (2), Pulmonary congestion (2), Respiratory disorder (2), Choking (2), Pulmonary fibrosis (1), Increased upper airway secretion (1), Nasal congestion (1), Sputum discoloured (1), Bronchospasm (1), Prolonged expiration (1), Apnoea (1), Dyspnoea exertional (1), Asthmatic crisis (1), Dysphonia (1), Increased bronchial secretion (1), Pulmonary mass (1), Oropharyngeal pain (1), Acute respiratory failure (1) |
| Reproductive system and breast disorders | Prostatitis (1), Pelvic congestion (1), Breast pain (1) |
| Renal and urinary disorders | Chromaturia (1), Micturition disorder (1), Pollakiuria (1) |
| Psychiatric disorders | Insomnia (3), Near death experience (2), Agitation (1), Depressed mood (1), Depression (1), Fear of death (1), Fear (1), Post-traumatic stress disorder (1), Anxiety (1), Anger (1), Hallucination (1), Panic attack (1) |
| Product issues | Product complaint (6), Device breakage (1) |
| Nervous system disorders | Dizziness (7), Headache (5), Paraesthesia (2), Mononeuropathy multiplex (2), Speech disorder (1), Hypersomnia (1), Hypotonia (1), Migraine with aura (1), Ageusia (1), Anosmia (1), Facial paralysis (1), Memory impairment (1), Syncope (1), Ischaemic stroke (1), Head discomfort (1), Lethargy (1), Cognitive disorder (1), Guillain-barre syndrome (1), Somnolence (1) |
| Neoplasms benign, malignant and unspecified (incl cysts and polyps) | Lung neoplasm (1), Neoplasm (1), Adenocarcinoma (1), Pancreatic carcinoma metastatic (1), Metastases to lung (1), Back pain (4), Arthralgia (3), Pain in extremity (3), Muscular weakness (1), Neck pain (1), Muscle spasms (1), Osteoporosis (1), Bursitis (1), Mobility decreased (1) |
| Metabolism and nutrition disorders | Decreased appetite (2), Weight loss poor (1) |
| Investigations | Oxygen saturation decreased (2), Blood pressure decreased (2), Eosinophil count decreased (1), Blood pressure increased (1), Interleukin level increased (1), Platelet count decreased (1), Blood bilirubin increased (1), Respiratory rate decreased (1), Body mass index increased (1), Weight increased (1) |
| Injury, poisoning and procedural complications | Product use in unapproved indication (48), Product dose omission issue (20), Off label use (19), Wrong technique in device usage process (11), Inappropriate schedule of product administration (9), Exposure via skin contact (5), Incorrect dose administered (4), Incorrect route of product administration (3), Wrong technique in product usage process (3), Product prescribing issue (3), Product use issue (2), Accidental exposure to product (2), Circumstance or information capable of leading to medication error (2), Intentional product use issue (1), Tooth injury (1), Incorrect product administration duration (1), Head injury (1), Underdose (1), Product dispensing error (1), Overdose (1), Device use error (1), Intercepted product administration error (1), Labelled drug-drug interaction medication error (1), Product administered at inappropriate site (1), Fall (1) |
| Infections and infestations | Pneumonia (13), Covid-19 (3), Nasopharyngitis (2), Bronchitis (2), Urinary tract infection (2), Viral infection (1), Sepsis (1), Aspergillus infection (1), Conjunctivitis (1), Infection (1), Pneumonia bacterial (1), Hypersensitivity (2), Drug hypersensitivity (1), Multiple allergies (1), Anaphylactic shock (1), Eosinophilic granulomatosis with polyangiitis (1) |
| Hepatobiliary disorders | Drug-induced liver injury (1) |
| General disorders and administration site conditions | Drug effect less than expected (49), Drug ineffective (13), Fatigue (10), Condition aggravated (9), Death (9), Malaise (7), Asthenia (6), Injection site pain (5), Therapeutic product effect incomplete (4), Illness (4), Pyrexia (3), Chest discomfort (3), Therapeutic response unexpected (2), Feeling hot (2), Drug ineffective for unapproved indication (2), Chills (2), Pain (2), Drug interaction (1), Gait disturbance (1), Disease complication (1), Adverse drug reaction (1), Disease recurrence (1), Treatment noncompliance (1), Peripheral swelling (1), Secretion discharge (1), Discomfort (1), Feeling abnormal (1), Adverse event (1), Injection site discomfort (1), Injury associated with device (1), Swelling face (1), Injection site bruising (1), Injection site haemorrhage (1), Gait inability (1), Chest pain (1), Facial discomfort (1), Facial pain (1), General physical health deterioration (1) |
| Gastrointestinal disorders | Nausea (3), Vomiting (3), Abdominal pain (2), Diarrhoea (2), Lip swelling (1), Abdominal pain upper (1), Dry mouth (1), Dental discomfort (1), Gingival pain (1), Gingival swelling (1), Mouth swelling (1), Swollen tongue (1), Abnormal faeces (1), Gastrointestinal disorder (1), Frequent bowel movements (1), Enterocolitis (1), Dysphagia (1), Anal fissure haemorrhage (1), Haemorrhoids (1) |
| Eye disorders | Iritis (1), Visual impairment (1), Blindness unilateral (1) |
| Cardiac disorders | Cardio-respiratory arrest (1), Cardiovascular disorder (1), Palpitations (1), Cardiac disorder (1) |
| Blood and lymphatic system disorders | Lymphadenopathy (1) |

**Table S8:** Frequency and Signal Intensity of AEs at PT Level for Tezepelumab

| SOC | PT (N) |
| --- | --- |
| Vascular disorders | Thrombosis (1) |
| Surgical and medical procedures | Therapy interrupted (2), Contraceptive diaphragm (1), Hospitalisation (1), Analgesic therapy (1) |
| Skin and subcutaneous tissue disorders | Urticaria (1), Pruritus (1), Hyperhidrosis (1) |
| Respiratory, thoracic and mediastinal disorders | Asthma (4), Dyspnoea (3), Cough (2), Nasal congestion (1), Rhinorrhoea (1), Upper airway obstruction (1), Productive cough (1), Snoring (1), Dyspnoea exertional (1), Dyspnoea paroxysmal nocturnal (1), Pleural effusion (1), Lung infiltration (1), Chronic obstructive pulmonary disease (1), Respiratory failure (1), Emphysema (1) |
| Renal and urinary disorders | Haematuria (1) |
| Psychiatric disorders | Near death experience (1), Frustration tolerance decreased (1) |
| Product issues | Device leakage (1) |
| Nervous system disorders | Dizziness (2), Anosmia (1), Ageusia (1), Somnolence (1) |
| Neoplasms benign, malignant and unspecified (incl cysts and polyps) | Colorectal adenoma (1) |
| Musculoskeletal and connective tissue disorders | Arthralgia (5), Joint swelling (3), Mastication disorder (1), Myalgia (1), Musculoskeletal chest pain (1) |
| Metabolism and nutrition disorders | Decreased appetite (1), Hyperlipidaemia (1), Hyperglycaemia (1), Lactic acidosis (1) |
| Investigations | Weight increased (1), Weight decreased (1), Blood sodium (1), Biopsy lung (1), Mean cell volume abnormal (1), Glomerular filtration rate abnormal (1), Blood glucose (1), Monocyte count abnormal (1), Mean cell haemoglobin increased (1), Blood urea increased (1), Lipase (1), Platelet count decreased (1), Mean cell haemoglobin concentration (1), Red cell distribution width increased (1), White blood cell count (1), Blood creatinine increased (1), Human metapneumovirus test positive (1), Blood pressure decreased (1) |
| Injury, poisoning and procedural complications | Product dose omission issue (1), Tooth injury (1), Off label use (1) |
| Infections and infestations | Bronchiolitis (2), Influenza (1), Covid-19 (1), Nasopharyngitis (1), Pneumonia (1), Diverticulitis (1), Sepsis (1), Bronchitis (1), Respiratory tract infection (1), Aspergillus infection (1) |
| Immune system disorders | Hypersensitivity (2), Type iii immune complex mediated reaction (1), Immune system disorder (1), Allergy to plants (1), Seasonal allergy (1) |
| Hepatobiliary disorders | Hepatic steatosis (1) |
| General disorders and administration site conditions | Fatigue (5), Drug ineffective (4), Pain (2), Condition aggravated (2), Pyrexia (1), Oedema (1), Chills (1), Asthenia (1), Injection site pain (1), Death (1), Swelling face (1) |
| Gastrointestinal disorders | Abdominal discomfort (1) |
| Eye disorders | Ocular hyperaemia (1) |
| Cardiac disorders | Atrial fibrillation (3), Cardiac failure congestive (2), Cardiomegaly (1), Myocardial infarction (1), Cardiac arrest (1) |
| Blood and lymphatic system disorders | Red blood cell abnormality (1), Leukocytosis (1), Coagulopathy (1) |
